# Supplementary material
Source: MDPI journal article supplement (https://www.mdpi.com/1999-4907/13/10/1732)
Supplement: s1 [file s1]

## Supplementary materials

### Vlaschenko et al. Bat assemblages are shaped by land cover types and forest age: a case study from Eastern Ukraine

Table S1 Classification of bats from *Vespertilionidae* family inhabiting Kharkiv region into different ecological groups, migratory status, and summer roost-sites selection (by Vlaschenko et al. 2021 Vlaschenko 2006; Strelkov and Il'in 1990 Russo et al. 2016; Dietz and Kiefer 2014; Boie and Dietz 2005).

| Bat species           | Migratory status      | Roost-sites selection in breeding period | Ecological group            |
|-----------------------|-----------------------|------------------------------------------|-----------------------------|
| <i>M. daubentonii</i> | resident              | tree cavities                            | water-associated            |
| <i>M. dasycneme</i>   | resident              | roost in buildings                       | water-associated            |
| <i>M. brandtii</i>    | resident              | tree cavities                            | forest-dwelling specialists |
| <i>M. nattereri</i>   | resident              | tree cavities                            | forest-dwelling specialists |
| <i>N. leisleri</i>    | long-distance migrant | tree cavities                            | forest-dwelling specialists |
| <i>N. lasiopterus</i> | long-distance migrant | tree cavities                            | forest-dwelling specialists |
| <i>N. noctula</i>     | partial migrant       | tree cavities                            | forest-dwelling specialists |
| <i>E. serotinus</i>   | resident              | roost in buildings                       | urban- and rural-dwellers   |
| <i>P. pygmaeus</i>    | long-distance migrant | roosting both in trees and houses        | generalists                 |
| <i>P. nathusii</i>    | long-distance migrant | roosting both in trees and houses        | generalists                 |
| <i>P. kuhlii</i>      | resident              | roost in buildings                       | urban- and rural-dwellers   |
| <i>V. murinus</i>     | long-distance migrant | roosting both in trees and houses        | generalists                 |
| <i>Pl. austriacus</i> | resident              | roost in buildings                       | urban- and rural-dwellers   |
| <i>Pl. auritus</i>    | resident              | tree cavities                            | forest-dwelling specialists |

Table S2. Results of the rarefaction analysis for all studied plots. s.e. - standard error, LCL - lower confidence limit, UCL - upper confidence limit.

| Plot      | Indices          | Observed | Estimator | s.e.  | LCL   | UCL    |
|-----------|------------------|----------|-----------|-------|-------|--------|
| Koziyivka | Species richness | 3.000    | 3.000     | 0.479 | 3.000 | 4.488  |
|           | Shannon          | 2.139    | 2.200     | 0.201 | 2.139 | 2.593  |
|           | Simpson          | 1.968    | 2.019     | 0.185 | 1.968 | 2.382  |
| Karavan   | Species richness | 8.000    | 8.000     | 0.251 | 8.000 | 8.560  |
|           | Shannon          | 2.919    | 2.963     | 0.232 | 2.919 | 3.417  |
|           | Simpson          | 1.906    | 1.914     | 0.133 | 1.906 | 2.174  |
| Liptsy    | Species richness | 6.000    | 6.000     | 0.528 | 6.000 | 7.561  |
|           | Shannon          | 3.144    | 3.194     | 0.201 | 3.144 | 3.587  |
|           | Simpson          | 2.424    | 2.445     | 0.195 | 2.424 | 2.826  |
| Neskuchne | Species richness | 6.000    | 6.990     | 2.201 | 6.072 | 19.549 |
|           | Shannon          | 1.954    | 2.018     | 0.200 | 1.954 | 2.411  |
|           | Simpson          | 1.409    | 1.415     | 0.127 | 1.409 | 1.664  |
| Starytsia | Species richness | 6.000    | 6.991     | 1.856 | 6.089 | 16.981 |
|           | Shannon          | 1.717    | 1.772     | 0.208 | 1.717 | 2.181  |
|           | Simpson          | 1.302    | 1.306     | 0.086 | 1.302 | 1.474  |
| Tetleha   | Species richness | 8.000    | 8.000     | 0.503 | 8.000 | 9.445  |
|           | Shannon          | 2.199    | 2.223     | 0.161 | 2.199 | 2.539  |
|           | Simpson          | 1.473    | 1.476     | 0.077 | 1.473 | 1.626  |
| Pechenihy | Species richness | 7.000    | 7.000     | 0.053 | 7.000 | 7.107  |

|             |                  |        |        |       |        |        |
|-------------|------------------|--------|--------|-------|--------|--------|
|             | Shannon          | 3.575  | 3.606  | 0.187 | 3.575  | 3.972  |
|             | Simpson          | 2.730  | 2.744  | 0.136 | 2.730  | 3.010  |
| Pechenichy2 | Species richness | 9.000  | 9.499  | 1.321 | 9.030  | 17.428 |
|             | Shannon          | 4.991  | 5.035  | 0.195 | 4.991  | 5.418  |
|             | Simpson          | 3.832  | 3.853  | 0.201 | 3.832  | 4.247  |
| Mokhnach    | Species richness | 8.000  | 8.000  | 0.544 | 8.000  | 9.589  |
|             | Shannon          | 4.932  | 5.029  | 0.279 | 4.932  | 5.577  |
|             | Simpson          | 4.004  | 4.070  | 0.306 | 4.004  | 4.670  |
| Homilsha    | Species richness | 10.000 | 11.996 | 3.735 | 10.180 | 32.091 |
|             | Shannon          | 2.711  | 2.741  | 0.142 | 2.711  | 3.019  |
|             | Simpson          | 1.816  | 1.818  | 0.087 | 1.816  | 1.990  |
| Yaremivka   | Species richness | 10.000 | 10.499 | 1.321 | 10.030 | 18.431 |
|             | Shannon          | 3.395  | 3.421  | 0.156 | 3.395  | 3.726  |
|             | Simpson          | 2.378  | 2.383  | 0.099 | 2.378  | 2.576  |

Table S3a. Effect of habitat variables on species richness. Significance of the fixed effects obtained by LRT.

| Variable   | chi2_LR | df | LTR p-value |
|------------|---------|----|-------------|
| field      | 3.600   | 1  | 0.057       |
| forest     | 3.159   | 1  | 0.075       |
| lake       | 4.079   | 1  | 0.043       |
| meadow     | 2.662   | 1  | 0.102       |
| floodplain | 1.668   | 1  | 0.196       |

Species richness Poisson vs habitats

formula: N\_species ~ lake + meadow + field + forest + floodplain + (1 | Plot\_Acr/Site)

Estimation of lambda by Laplace ML approximation (p\_v).

Estimation of fixed effects by Laplace ML approximation (p\_v).

family: poisson( link = log )

----- Fixed effects (beta) -----

|             | Estimate | Cond. SE | t-value |
|-------------|----------|----------|---------|
| (Intercept) | -1.25032 | 1.19425  | -1.047  |
| lake        | 0.03433  | 0.01784  | 1.925   |
| meadow      | 0.02960  | 0.01768  | 1.674   |
| field       | 0.03397  | 0.01650  | 2.058   |
| forest      | 0.02744  | 0.01548  | 1.773   |
| floodplain  | 0.02852  | 0.02286  | 1.248   |

----- Random effects -----

Family: gaussian( link = identity )

--- Variance parameters ('lambda'):

lambda = var(u) for u ~ Gaussian;

Site:Plot. : 0.04785

Plot\_Acr : 0.2165

--- Coefficients for log(lambda):

| Group | Term | Estimate | Cond.SE |
|-------|------|----------|---------|
|-------|------|----------|---------|

|            |             |       |        |
|------------|-------------|-------|--------|
| Site:Plot. | (Intercept) | -3.04 | 0.4402 |
|------------|-------------|-------|--------|

|          |             |       |       |
|----------|-------------|-------|-------|
| Plot_Acr | (Intercept) | -1.53 | 0.473 |
|----------|-------------|-------|-------|

# of obs: 101; # of groups: Site:Plot., 100; Plot\_Acr, 11

----- Likelihood values -----  
logLik  
p\_v(h) (marginal L): -202.5633  
lambda leverages numerically 1 were replaced by 1- 1e-08 (as controlled by option  
'regul\_lev\_lambda')

Table S3b. Effect of forest age variables on species richness. Significance of the fixed effects obtained by LRT.

| Variable     | chi2_LR | df | LTR p-value |
|--------------|---------|----|-------------|
| decid 11-40  | 2.227   | 1  | 0.135       |
| decid 41-90  | 1.344   | 1  | 0.246       |
| decid 91-150 | 0.122   | 1  | 0.726       |
| decid >150   | 0.184   | 1  | 0.667       |
| clearcut     | 0.095   | 1  | 0.757       |

Species richness Poisson vs forest age

formula: N\_species ~ decid\_11\_40 + decid\_41\_90 + decid\_91\_150 + decid\_more150 +  
clearcut + (1 | Plot\_Acr/Site)

Estimation of lambda by Laplace ML approximation (p\_v).

Estimation of fixed effects by Laplace ML approximation (p\_v).

family: poisson( link = log )

----- Fixed effects (beta) -----

|               | Estimate   | Cond. SE | t-value |
|---------------|------------|----------|---------|
| (Intercept)   | 0.8859226  | 0.233255 | 3.7981  |
| decid_11_40   | -0.0733676 | 0.031647 | -2.3183 |
| decid_41_90   | 0.0068897  | 0.006022 | 1.1442  |
| decid_91_150  | -0.0002255 | 0.004085 | -0.0552 |
| decid_more150 | 0.0066694  | 0.010257 | 0.6503  |
| clearcut      | -0.0110411 | 0.018483 | -0.5974 |

----- Random effects -----

Family: gaussian( link = identity )

--- Variance parameters ('lambda'):

lambda = var(u) for u ~ Gaussian;

Site:Plot. : 0.06115

Plot\_Acr : 0.08359

--- Coefficients for log(lambda):

| Group      | Term        | Estimate | Cond.SE |
|------------|-------------|----------|---------|
| Site:Plot. | (Intercept) | -2.794   | 0.392   |
| Plot_Acr   | (Intercept) | -2.482   | 0.5342  |

# of obs: 101; # of groups: Site:Plot., 100; Plot\_Acr, 11

----- Likelihood values -----

logLik

p\_v(h) (marginal L): -200.6567

Table S4a. Effect of habitat variables on the number of individuals. Significance of the fixed effects obtained by LRT.

| Variable   | chi2_LR | df | LTR p-value |
|------------|---------|----|-------------|
| field      | 4.044   | 1  | 0.044       |
| forest     | 3.388   | 1  | 0.065       |
| lake       | 4.728   | 1  | 0.029       |
| meadow     | 2.895   | 1  | 0.088       |
| floodplain | 1.001   | 1  | 0.317       |

Number of individuals vs habitats, negative binomial  
summary(fit\_b\_h\_glm\_nb)

formula: Number\_of\_individuals ~ lake + meadow + field + forest + floodplain +  
(1 | Plot\_Acr/Site)

Estimation of fixed effects by ML.

Estimation of NB\_shape by 'outer' ML, maximizing p\_v.

family: Neg.binomial(shape=0.4799)( link = log )

----- Fixed effects (beta) -----

|             | Estimate | Cond. SE | t-value |
|-------------|----------|----------|---------|
| (Intercept) | 0.80986  | 1.82329  | 0.4442  |
| lake        | 0.05565  | 0.03254  | 1.7099  |
| meadow      | 0.03539  | 0.02742  | 1.2905  |
| field       | 0.02754  | 0.02474  | 1.1130  |
| forest      | 0.02984  | 0.02381  | 1.2534  |
| floodplain  | -0.02064 | 0.03755  | -0.5497 |

----- Likelihood values -----

logLik

p(h) (Likelihood): -400.2157

Table S4b. Effect of forest age variables on the number of individuals. Significance of the fixed effects obtained by LRT.

| Variable     | chi2_LR | df | LTR p-value |
|--------------|---------|----|-------------|
| decid 11-40  | 1.201   | 1  | 0.273       |
| decid 41-90  | 0.127   | 1  | 0.721       |
| decid 91-150 | 0.082   | 1  | 0.774       |
| decid >150   | 0.377   | 1  | 0.538       |
| clear-cut    | 1.403   | 1  | 0.997       |

```
#####Number of individuals vs forest age, negative binomial
summary(fit_b_h_glm_nb_forest_short)
formula: Number_of_individuals ~ decid_11_40 + decid_41_90 + decid_91_150 +
  decid_more150 + clearcut + (1 | Plot_Acr/Site)
Estimation of fixed effects by Laplace ML approximation (p_v).
Estimation of lambda and NB_shape by 'outer' ML, maximizing p_v.
family: Neg.binomial(shape=0.5225)( link = log )
----- Fixed effects (beta) -----
              Estimate      Cond. SE      t-value
(Intercept)    3.003998    0.448161    6.7029
decid_11_40   -0.102665    0.047807   -2.1475
decid_41_90    0.001619    0.011999    0.1349
decid_91_150   0.003598    0.008232    0.4371
decid_more150  0.013242    0.019117    0.6927
clearcut       -0.023975    0.033477   -0.7161
----- Random effects -----
Family: gaussian( link = identity )
--- Variance parameters ('lambda'):
lambda = var(u) for u ~ Gaussian;
Site:Plot. : 3.468e-05
Plot_Acr : 0.1297
# of obs: 101; # of groups: Site:Plot., 100; Plot_Acr, 11
----- Likelihood values -----
              logLik
p_v(h) (marginal L): -398.4236
```

Table S5a Land cover types RDA ANOVA summary model table.

Permutation test for rda under reduced model

Permutation: free

Number of permutations: 999

Model: rda(formula = hel\_com\_net ~ field + forest + floodplain + lake + meadow, data = data)

|          | Df | Variance | F      | Pr(>F)  |
|----------|----|----------|--------|---------|
| Model    | 5  | 0.04390  | 1.7722 | 0.015 * |
| Residual | 96 | 0.47562  |        |         |

---

Signif. codes: 0 '\*\*\*' 0.001 '\*\*' 0.01 '\*' 0.05 '.' 0.1 ' ' 1

> anova.cca(rda\_hab\_net, by = 'axis', step = 1000, model = 'reduced') ## nothing but first is marginal (p = 0.128, F = 2.72)

Permutation test for rda under reduced model

Forward tests for axes

Permutation: free

Number of permutations: 999

Model: rda(formula = hel\_com\_net ~ field + forest + floodplain + lake + meadow, data = data)

|          | Df | Variance | F      | Pr(>F) |
|----------|----|----------|--------|--------|
| RDA1     | 1  | 0.01693  | 3.4177 | 0.210  |
| RDA2     | 1  | 0.01333  | 2.6907 | 0.272  |
| RDA3     | 1  | 0.01001  | 2.0198 | 0.385  |
| RDA4     | 1  | 0.00272  | 0.5487 | 0.958  |
| RDA5     | 1  | 0.00091  | 0.1843 | 0.987  |
| Residual | 96 | 0.47562  |        |        |

> anova.cca(rda\_hab\_net, by = 'terms', step = 1000, model = 'reduced') ## clearcut signif (0.026), lake signif (0.047) and meadow signif (0.04)

Permutation test for rda under reduced model

Terms added sequentially (first to last)

Permutation: free

Number of permutations: 999

Model: rda(formula = hel\_com\_net ~ field + forest + floodplain + lake + meadow, data = data)

|            | Df | Variance | F      | Pr(>F)  |
|------------|----|----------|--------|---------|
| field      | 1  | 0.00568  | 1.1474 | 0.325   |
| forest     | 1  | 0.01145  | 2.3101 | 0.048 * |
| floodplain | 1  | 0.00700  | 1.4128 | 0.201   |
| lake       | 1  | 0.01056  | 2.1306 | 0.049 * |
| meadow     | 1  | 0.00922  | 1.8602 | 0.106   |
| Residual   | 96 | 0.47562  |        |         |

---

Signif. codes: 0 '\*\*\*' 0.001 '\*\*' 0.01 '\*' 0.05 '.' 0.1 ' ' 1



>

Table S5b Forest age RDA ANOVA summary model table

Permutation test for rda under reduced model

Permutation: free

Number of permutations: 999

Model: rda(formula = hel\_com\_net ~ decid\_11\_40 + decid\_41\_90 + decid\_91\_150 + decid\_more150 + clearcut, data = data)

|          | Df | Variance | F      | Pr(>F)    |
|----------|----|----------|--------|-----------|
| Model    | 5  | 0.05985  | 2.5001 | 0.001 *** |
| Residual | 96 | 0.45966  |        |           |

---

Signif. codes: 0 '\*\*\*' 0.001 '\*\*' 0.01 '\*' 0.05 '.' 0.1 ' ' 1

> anova.cca(rda\_for\_net, by = 'axis', step = 1000) ## first RDA is signif, p = 0.004, second RDA marginal (p = 0.08)

Permutation test for rda under reduced model

Forward tests for axes

Permutation: free

Number of permutations: 999

Model: rda(formula = hel\_com\_net ~ decid\_11\_40 + decid\_41\_90 + decid\_91\_150 + decid\_more150 + clearcut, data = data)

|          | Df | Variance | F      | Pr(>F)    |
|----------|----|----------|--------|-----------|
| RDA1     | 1  | 0.03721  | 7.7718 | 0.001 *** |
| RDA2     | 1  | 0.01619  | 3.3809 | 0.109     |
| RDA3     | 1  | 0.00334  | 0.6983 | 0.985     |
| RDA4     | 1  | 0.00258  | 0.5397 | 0.968     |
| RDA5     | 1  | 0.00053  | 0.1098 | 0.998     |
| Residual | 96 | 0.45966  |        |           |

---

Signif. codes: 0 '\*\*\*' 0.001 '\*\*' 0.01 '\*' 0.05 '.' 0.1 ' ' 1

> anova.cca(rda\_for\_net, by = 'terms', step = 1000) ## decid\_10 (p=0.002) and decid150 is signif. (p=0.004)

Permutation test for rda under reduced model

Terms added sequentially (first to last)

Permutation: free

Number of permutations: 999

Model: rda(formula = hel\_com\_net ~ decid\_11\_40 + decid\_41\_90 + decid\_91\_150 + decid\_more150 + clearcut, data = data)

|               | Df | Variance | F      | Pr(>F)    |
|---------------|----|----------|--------|-----------|
| decid_11_40   | 1  | 0.03487  | 7.2820 | 0.001 *** |
| decid_41_90   | 1  | 0.00289  | 0.6032 | 0.720     |
| decid_91_150  | 1  | 0.00218  | 0.4549 | 0.827     |
| decid_more150 | 1  | 0.01549  | 3.2343 | 0.010 **  |

clearcut 1 0.00443 0.9260 0.472  
 Residual 96 0.45966

---

Signif. codes: 0 '\*\*\*' 0.001 '\*\*' 0.01 '\*' 0.05 '.' 0.1 ' ' 1

Table S6 Breeding status for each bat species within the study plots (two species from urban- and rural-dwelling group are not included) B - breeding, NB - not breeding, mostly males

| Plot | Bat species |     |     |     |     |     |     |     |     |     |
|------|-------------|-----|-----|-----|-----|-----|-----|-----|-----|-----|
|      | MDA         | MBR | MDS | NNO | NLE | NLA | PNA | PPY | VMU | PAU |
| KOZ  | B           |     |     |     | NB  |     |     |     |     | B   |
| KAR  | B           |     |     | B   | B   | B   | B   | B   |     | B   |
| LIP  | B           |     |     | B   |     |     | B   | B   | B   |     |
| NES  | B           |     |     | B   | B   |     | B   |     | B   | NB  |
| STR  | B           |     |     | B   | B   |     | NB  | B   |     | B   |
| TET  | B           | NB  |     | B   | B   |     | B   | B   |     | B   |
| PEC  | B           |     | B   | B   | B   |     | B   | B   |     | B   |
| PEC2 | B           |     | B   | B   | B   |     | B   | B   | B   | B   |
| MOK  | B           | B   |     | B   | B   |     | B   | B   |     | B   |
| HOM  | B           | B   | B   | B   | B   |     | B   | B   |     | B   |
| YAR  | B           | B   | NB  | B   | B   |     | B   | B   | B   | B   |



Table S7 The variability of b/h<sub>s</sub> index by all studied plots.

| Bat | Location (n - number of nights when each species was caught) |                                                         |                                                         |                                                         |                                                         |                                                           |                                                           |                                                         |                                                         |                                                         |                                                         |
|-----|--------------------------------------------------------------|---------------------------------------------------------|---------------------------------------------------------|---------------------------------------------------------|---------------------------------------------------------|-----------------------------------------------------------|-----------------------------------------------------------|---------------------------------------------------------|---------------------------------------------------------|---------------------------------------------------------|---------------------------------------------------------|
|     | KOZ                                                          | TET                                                     | PEC                                                     | MOK                                                     | NES                                                     | HOM                                                       | YAR                                                       | LIP                                                     | PEC2                                                    | KAR                                                     | STR                                                     |
| MDA | n=4<br>median=0.36<br>mean=0.5<br>min=0.14<br>max=1.14       | n=4<br>median=0.36<br>mean=0.42<br>min=0.13<br>max=0.83 | n=6<br>median=0.32<br>mean=0.43<br>min=0.14<br>max=0.86 | n=1<br>0.129                                            | n=2<br>median=0.34<br>mean=0.34<br>min=0.14<br>max=0.55 | n=9<br>median=0.27<br>mean=0.79<br>min=0.13<br>max=2.48   | n=13<br>median=0.54<br>mean=1.24<br>min=0.14<br>max=7.56  | n=2<br>median=0.21<br>mean=0.21<br>min=0.14<br>max=0.28 | n=7<br>median=1.43<br>mean=1.51<br>min=0.14<br>max=3.14 | n=3<br>median=0.14<br>mean=0.23<br>min=0.14<br>max=0.43 | n=1<br>0.28                                             |
| NNO | un                                                           | n=6<br>median=6.15<br>mean=6.88<br>min=0.8<br>max=14.4  | n=7<br>median=4.29<br>mean=4.63<br>min=0.27<br>max=9.68 | n=6<br>median=0.27<br>mean=0.63<br>min=0.13<br>0.2.14   | n=4<br>median=2.84<br>mean=2.97<br>min=0.29<br>max=5.93 | n=12<br>median=2.86<br>mean=4.13<br>min=0.14<br>max=16.71 | n=12<br>median=3.43<br>mean=6.37<br>min=0.13<br>max=26.67 | n=6<br>median=1.78<br>mean=2.36<br>min=1.0<br>max=5.43  | n=8<br>median=3.71<br>mean=4.0<br>min=0.43<br>max=9.71  | n=5<br>median=3.57<br>mean=4.8<br>min=2.57<br>max=11.57 | n=7<br>median=0.71<br>mean=1.4<br>min=0.14<br>max=5.57  |
| NLE | n=1<br>0.14                                                  | n=4<br>median=0.43<br>mean=0.53<br>min=0.27<br>max=1.0  | n=3<br>median=0.21<br>mean=0.31<br>min=0.14<br>max=0.57 | n=6<br>median=0.27<br>mean=0.53<br>min=0.13<br>max=1.71 | n=3<br>median=0.14<br>mean=0.18<br>min=0.14<br>max=0.26 | n=6<br>median=0.2<br>mean=0.25<br>min=0.14<br>max=0.53    | n=3<br>median=0.18<br>mean=0.18<br>min=0.14<br>max=0.22   | un                                                      | n=3<br>median=2.0<br>mean=2.24<br>min=0.86<br>max=3.85  | n=6<br>median=0.57<br>mean=0.69<br>min=0.14<br>max=1.43 | n=3<br>median=0.43<br>mean=0.38<br>min=0.14<br>max=0.57 |
| PNA | un                                                           | n=4<br>median=0.28<br>mean=0.28<br>min=0.13<br>max=0.41 | n=7<br>median=3.16<br>mean=3.26<br>min=0.53<br>max=6.0  | n=5<br>median=0.13<br>mean=0.35<br>min=0.13<br>max=0.83 | n=3<br>median=0.28<br>mean=0.27<br>min=0.13<br>max=0.41 | n=11<br>median=0.28<br>mean=0.29<br>min=0.13<br>max=0.71  | n=11<br>median=0.47<br>mean=1.19<br>min=0.14<br>max=3.17  | n=6<br>median=0.64<br>mean=0.88<br>min=0.14<br>max=2.14 | n=7<br>median=1.57<br>mean=1.92<br>min=0.14<br>max=6.14 | n=2<br>median=0.28<br>mean=0.28<br>min=0.14<br>max=0.43 | n=1<br>0.14                                             |
| PPY | un                                                           | n=3<br>median=0.14<br>mean=0.18<br>min=0.13<br>max=0.29 | n=6<br>median=0.34<br>mean=0.65<br>min=0.14<br>max=2.0  | n=4<br>median=0.41<br>mean=1.55<br>min=0.13<br>max=5.24 | un                                                      | n=7<br>median=0.40<br>mean=1.03<br>min=1.33<br>max=3.57   | n=9<br>median=1.04<br>mean=1.50<br>min=0.14<br>max=4.66   | n=4<br>median=0.43<br>mean=0.71<br>min=0.14<br>max=1.86 | n=5<br>median=0.57<br>mean=0.83<br>min=0.14<br>max=2.14 | n=3<br>median=0.14<br>mean=0.28<br>min=0.14<br>max=0.57 | n=1<br>0.14                                             |
| PAU | n=5<br>median=0.61<br>mean=0.72<br>min=0.29                  | n=5<br>median=0.28<br>mean=0.37<br>min=0.13             | n=2<br>median=1.70<br>mean=1.70<br>min=0.14             | n=4<br>median=0.14<br>mean=0.14<br>min=0.13             | n=1<br>0.125                                            | n=2<br>median=0.21<br>mean=0.21<br>min=0.14               | n=3<br>median=0.15<br>mean=0.32<br>min=0.13               | un                                                      | n=3<br>median=0.14<br>mean=0.28<br>min=0.14             | n=3<br>median=0.14<br>mean=0.28<br>min=0.14             | n=1<br>0.14                                             |

|  |          |         |          |          |  |          |          |  |          |          |  |
|--|----------|---------|----------|----------|--|----------|----------|--|----------|----------|--|
|  | max=1.44 | max=1.0 | max=3.25 | max=0.17 |  | max=0.28 | max=0.69 |  | max=0.57 | max=0.57 |  |
|--|----------|---------|----------|----------|--|----------|----------|--|----------|----------|--|

Table S8a. Effect of habitat variables on breeding activity. Significance of the fixed effects obtained by LRT.

| Variable   | chi2_LR | df | LTR p-value |
|------------|---------|----|-------------|
| Species    | 149.681 | 24 | 0.001       |
| field      | 36.294  | 5  | 0.001       |
| forest     | 31.653  | 5  | 0.001       |
| lake       | 25.431  | 5  | 0.001       |
| meadow     | 12.451  | 5  | 0.029       |
| floodplain | 11.733  | 5  | 0.038       |

Breeding activity vs habitats interaction with Species:

formula: SR ~ Species \* (Field + forest + lake + meadow + floodplain) +

(1 | Location/Net\_name)

Estimation of lambda by Laplace ML approximation (p\_v).

Estimation of fixed effects by Laplace ML approximation (p\_v).

family: binomial( link = logit )

----- Fixed effects (beta) -----

|                       | Estimate   | Cond. SE | t-value   |
|-----------------------|------------|----------|-----------|
| (Intercept)           | 1.287e+00  | 0.339494 | 3.790895  |
| SpeciesNLE            | 7.758e-02  | 1.398826 | 0.055461  |
| SpeciesPNA            | 6.261e-01  | 0.571832 | 1.094902  |
| SpeciesMDA            | -2.570e+00 | 1.229186 | -2.090616 |
| SpeciesPAU            | -1.175e+00 | 1.633014 | -0.719560 |
| Field                 | 2.590e-03  | 0.001337 | 1.937039  |
| forest                | 1.004e-03  | 0.000656 | 1.530234  |
| lake                  | 4.932e-03  | 0.002869 | 1.718915  |
| meadow                | 5.123e-03  | 0.001833 | 2.795125  |
| floodplain            | 1.769e-02  | 0.008175 | 2.164259  |
| SpeciesNLE:Field      | -1.351e-03 | 0.005215 | -0.258979 |
| SpeciesPNA:Field      | -9.393e-03 | 0.002601 | -3.611357 |
| SpeciesMDA:Field      | -4.845e-03 | 0.002981 | -1.625228 |
| SpeciesPAU:Field      | -8.952e-03 | 0.003393 | -2.638379 |
| SpeciesNLE:forest     | 1.487e-03  | 0.002286 | 0.650364  |
| SpeciesPNA:forest     | -2.390e-03 | 0.001227 | -1.947794 |
| SpeciesMDA:forest     | 6.988e-03  | 0.002793 | 2.501909  |
| SpeciesPAU:forest     | 2.597e-03  | 0.003063 | 0.847889  |
| SpeciesNLE:lake       | 3.232e-02  | 0.047148 | 0.685430  |
| SpeciesPNA:lake       | 7.780e-03  | 0.005250 | 1.481825  |
| SpeciesMDA:lake       | -1.807e-02 | 0.007204 | -2.508924 |
| SpeciesPAU:lake       | -1.358e-03 | 0.010490 | -0.129498 |
| SpeciesNLE:meadow     | -1.244e-02 | 0.006739 | -1.846627 |
| SpeciesPNA:meadow     | 3.551e-05  | 0.004057 | 0.008752  |
| SpeciesMDA:meadow     | -4.034e-03 | 0.003826 | -1.054230 |
| SpeciesPAU:meadow     | -2.058e-04 | 0.006920 | -0.029740 |
| SpeciesNLE:floodplain | -2.476e-02 | 0.020556 | -1.204759 |
| SpeciesPNA:floodplain | -6.004e-02 | 0.034994 | -1.715597 |
| SpeciesMDA:floodplain | -2.858e-02 | 0.026668 | -1.071717 |
| SpeciesPAU:floodplain | -4.154e-02 | 0.023611 | -1.759491 |

----- Random effects -----

```

Family: gaussian( link = identity )
      --- Variance parameters ('lambda'):
lambda = var(u) for u ~ Gaussian;
Net_name:. : 0.1426
Location : 2.114e-09
      --- Coefficients for log(lambda):
      Group      Term Estimate Cond.SE
Net_name:. (Intercept) -1.948 0.3279
Location (Intercept) -19.97 1237
# of obs: 2836; # of groups: Net_name:., 76; Location, 11
----- Likelihood values -----
                        logLik
p_v(h) (marginal L): -858.7869

```

Table S8b. Effect of forest age variables on breeding activity. Significance of the fixed effects obtained by LRT.

| Variable     | chi2_LR | df | LTR p-value |
|--------------|---------|----|-------------|
| Species      | 117.703 | 24 | <0.001      |
| decid_11-40  | 23.707  | 5  | <0.001      |
| decid_41-90  | 20.149  | 5  | 0.001       |
| decid_91-150 | 21.625  | 5  | <0.001      |
| decid_>150   | 15.550  | 5  | 0.008       |
| clearcut     | 15.930  | 5  | 0.007       |

#####Breeding activity vs forest age, binomial

formula: SR ~ Species \* (decid\_11.40 + decid\_41.90 + decid\_91\_150 + decid\_more150 + clearcut) + (1 | Location/Net\_name)

Estimation of lambda by Laplace ML approximation (p\_v).

Estimation of fixed effects by Laplace ML approximation (p\_v).

family: binomial( link = logit )

----- Fixed effects (beta) -----

|                          | Estimate   | Cond. SE  | t-value  |
|--------------------------|------------|-----------|----------|
| (Intercept)              | 1.511e+00  | 0.4311978 | 3.50308  |
| SpeciesNLE               | -1.885e+00 | 1.9279032 | -0.97752 |
| SpeciesPNA               | 3.532e-01  | 0.6419112 | 0.55030  |
| SpeciesMDA               | -2.519e+00 | 1.4978143 | -1.68207 |
| SpeciesPAU               | -1.192e+01 | 6.6026501 | -1.80508 |
| decid_11.40              | 1.444e-01  | 0.0559350 | 2.58094  |
| decid_41.90              | 9.248e-03  | 0.0035210 | 2.62665  |
| decid_91_150             | -3.031e-04 | 0.0007713 | -0.39292 |
| decid_more150            | -2.648e-02 | 0.0079057 | -3.34994 |
| clearcut                 | 2.068e-02  | 0.0095306 | 2.17031  |
| SpeciesNLE:decid_11.40   | -2.092e-01 | 0.0768621 | -2.72163 |
| SpeciesPNA:decid_11.40   | -2.747e-01 | 0.1554920 | -1.76684 |
| SpeciesMDA:decid_11.40   | -1.787e-01 | 0.0714751 | -2.49956 |
| SpeciesPAU:decid_11.40   | -1.947e-01 | 0.0739543 | -2.63278 |
| SpeciesNLE:decid_41.90   | 3.220e-03  | 0.0124879 | 0.25784  |
| SpeciesPNA:decid_41.90   | -1.604e-02 | 0.0060803 | -2.63765 |
| SpeciesMDA:decid_41.90   | 1.293e-03  | 0.0134806 | 0.09591  |
| SpeciesPAU:decid_41.90   | 5.963e-02  | 0.0359083 | 1.66057  |
| SpeciesNLE:decid_91_150  | 7.138e-03  | 0.0029758 | 2.39881  |
| SpeciesPNA:decid_91_150  | 4.054e-03  | 0.0022377 | 1.81160  |
| SpeciesMDA:decid_91_150  | 2.407e-03  | 0.0013275 | 1.81319  |
| SpeciesPAU:decid_91_150  | 2.160e-02  | 0.0152397 | 1.41765  |
| SpeciesNLE:decid_more150 | 1.790e-02  | 0.0156707 | 1.14252  |
| SpeciesPNA:decid_more150 | 4.798e-02  | 0.0168684 | 2.84454  |
| SpeciesMDA:decid_more150 | 4.538e-02  | 0.0335517 | 1.35244  |
| SpeciesPAU:decid_more150 | -3.801e-02 | 0.0386631 | -0.98300 |
| SpeciesNLE:clearcut      | -2.332e-02 | 0.0327672 | -0.71165 |
| SpeciesPNA:clearcut      | -4.684e-02 | 0.0182225 | -2.57055 |
| SpeciesMDA:clearcut      | 3.033e-03  | 0.0267464 | 0.11341  |
| SpeciesPAU:clearcut      | -3.292e-02 | 0.0425194 | -0.77413 |



```

----- Random effects -----
Family: gaussian( link = identity )
    --- Variance parameters ('lambda'):
lambda = var(u) for u ~ Gaussian;
    Net_name:. : 0.2008
    Location : 1.745e-07
    --- Coefficients for log(lambda):
    Group      Term Estimate Cond.SE
Net_name:. (Intercept) -1.605 0.2989
    Location (Intercept) -15.56 225.5
# of obs: 2836; # of groups: Net_name:., 76; Location, 11
----- Likelihood values -----
                        logLik
p_v(h) (marginal L): -859.6061

```

## Captions for Supplementary Figures

Figure S1. Detailed map of habitat composition of study plots.

Figure S2a. Habitat correlation before merging.

Figure S2b. Habitat correlation after merging several habitats.

Figure S3. Results of Redundancy Analysis revealing the relationship between the areas of different land cover types and assemblage structure at the plot level. **a)** Overlay of samples (at each mist-netting site) and species shown by grey arrows and orange 3-letter bat species abbreviations. **b)** Overlay of species shown with gray arrows and land cover types shown in green-blue: forest, lake, meadow, field and floodplain.

Figure S4a. Visualisation of GLMM results of revealing the relationship between the land cover types and number of individuals at the mist-netting site level.

Figure S4b. Visualisation of GLMM results of revealing the relationship between the forest age structure and number of individuals at the mist-netting site level.

Figure S5a. Sex ratio of *P. nathusii* (*PNA*) calculated using the total sample of all adult individuals and for each of 4 plots with more than 10 individuals.

Figure S5b. Sex ratio of *N. noctula* (*NNO*) calculated using the total sample of all adult individuals and for each of 9 plots with more than 10 individuals.

Figure S5c. Sex ratio of *M. daubentonii* (*MDA*) calculated using the total sample of all adult individuals and for each of 3 plots with more than 10 individuals.

Figure S6a-c Roosting tree of numerous colony of *P. pygmaeus* and *P. nathusii*.
